# Supplementary material
Source: Springer Nature journal article supplement (https://www.springermedizin.de/resource/supplementary/12957_2011_888_MOESM2_ESM.pdf/9565736)

2A

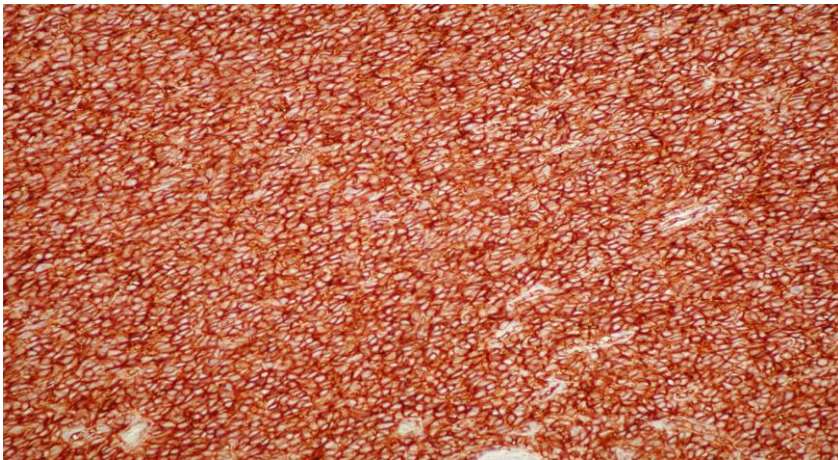

2B

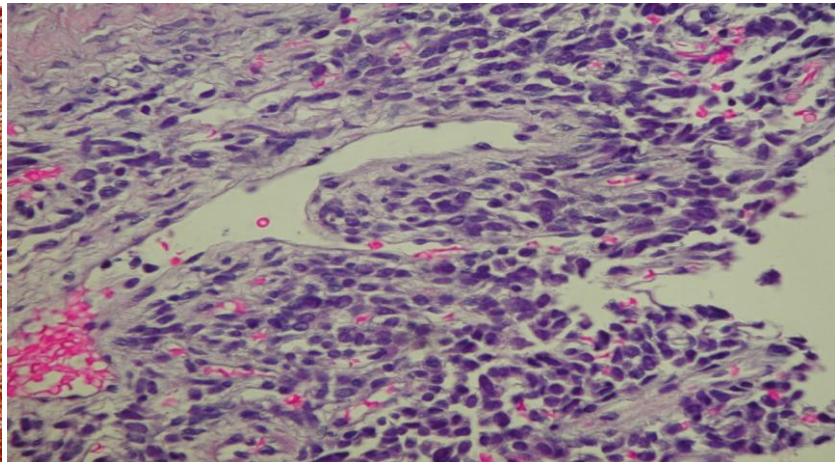

Supplement: MOESM2 [file 9565736]
